# Supplementary material for: Hierarchical bilayered hybrid nanostructural arrays of NiCo2O4micro-urchins and nanowires as a free-standing electrode with high loading for high-performance lithium-ion batteries
Source: Royal Society of Chemistry journal article supplement (doi:10.1039/c7nr03979d), 2017-01-01
Supplement: c7nr03979d1.pdf [file c7nr03979d1.pdf]

## Supporting information

### Hierarchical bilayered hybrid nanostructural arrays of $\text{NiCo}_2\text{O}_4$ microurchins and nanowires as free-standing electrode with high loading for high-performance lithium-ion batteries

Yu Wang,<sup>a,c</sup> Pengcheng Liu,<sup>b\*</sup> Kongjun Zhu,<sup>a\*</sup> Jing Wang,<sup>a</sup> Jinsong Liu<sup>a,c</sup>

<sup>a</sup> State Key Laboratory of Mechanics and Control of Mechanical Structures, Nanjing University of Aeronautics and Astronautics, Nanjing 210016, China

<sup>b</sup> School of Mechanical and Electric Engineering, Guangzhou University, Guangzhou 510006

<sup>c</sup> China College of Materials Science and Engineering, Nanjing University of Aeronautics and Astronautics, Nanjing 210016, China

Corresponding Author: [kjzhu@nuaa.edu.cn](mailto:kjzhu@nuaa.edu.cn) (K. Zhu); [pch060710111@hotmail.com](mailto:pch060710111@hotmail.com) (P. Liu)



**Figure S1.** SEM images and the corresponding XRD images of these products prepared in pH=3, pH=5, pH=7 under hydrothermal condition, respectively.



**Figure S2** TG measurement of NiCo-precursor HNAs at a temperature range of 0-800 °C and the heating rate 10 °C /min

To further confirm the calcination temperature during annealing, we conduct the TG measurement of NiCo-precursor HNAs at a temperature range of 0-800 °C with a heating rate of 10 °C /min, and the TG data is shown in Figure R1. The XRD pattern of the Ni-Co precursors, which may be mixture of  $\text{Co}_2(\text{CO}_3)(\text{OH})_2 \cdot 0.11\text{H}_2\text{O}$  and  $\text{Ni}_2(\text{CO}_3)(\text{OH})_2 \cdot 4\text{H}_2\text{O}$ , is shown in Figure R2. In Figure R1, the initial 1 % mass loss between 50 and 200 °C is due to the evaporation of moisture. The large mass loss of about 3 % between 200 and 300 °C can be observed, which is attributed to the release of  $\text{CO}_2$  and hydrolysis during the transformation from  $\text{Co}_2(\text{CO}_3)(\text{OH})_2 \cdot 0.11\text{H}_2\text{O}$  and  $\text{Ni}_2(\text{CO}_3)(\text{OH})_2 \cdot 4\text{H}_2\text{O}$  to  $\text{NiCo}_2\text{O}_4$ . The mass have a slight increase during the following temperature rise, which may be caused by the oxidation of metallic Ni. Thus, selecting 300 °C as the annealing temperature can not only ensure the complete transformation from  $\text{Co}_2(\text{CO}_3)(\text{OH})_2 \cdot 0.11\text{H}_2\text{O}$  and  $\text{Ni}_2(\text{CO}_3)(\text{OH})_2 \cdot 4\text{H}_2\text{O}$  to  $\text{NiCo}_2\text{O}_4$ , but also avoid the excessive oxidation of nickel foam. In addition, our dense  $\text{NiCo}_2\text{O}_4$  HNAs on NF can have an effect to prevent the oxidation of NF during annealing. So, the calcination temperature was finally set as 300 °C.



**Figure S3** Raman spectra of  $\text{NiCo}_2\text{O}_4$  HNAs.



**Figure S4** The SEM images of  $\text{NiCo}_2\text{O}_4$  HNAs before and after ultrasonic treatment.



**Figure S5** Nitrogen adsorption/desorption isotherms and pore-size distribution curves for NiCo<sub>2</sub>O<sub>4</sub> HNAs.

**Table S1.** Electrochemical performance of different NiCo<sub>2</sub>O<sub>4</sub> electrodes.

| Type of materials                                                                | Capacity                                              | Rate performance                                      | Cycling stability                                  | loading (mg/cm <sup>2</sup> ) | Reference |
|----------------------------------------------------------------------------------|-------------------------------------------------------|-------------------------------------------------------|----------------------------------------------------|-------------------------------|-----------|
| NiCo <sub>2</sub> O <sub>4</sub> HNAs/NF                                         | 1094 mAh g <sup>-1</sup> (at 500mA g <sup>-1</sup> )  | 875 mAh g <sup>-1</sup> (at 1000 mA g <sup>-1</sup> ) | 90 % (After 100 cycles at 500 mA g <sup>-1</sup> ) | 7                             | This work |
| NiCo <sub>2</sub> O <sub>4</sub> NWAs/CT                                         | 1012 mAh g <sup>-1</sup> (at 500mA g <sup>-1</sup> )  | 589 mAh g <sup>-1</sup> (at 3000 mA g <sup>-1</sup> ) | 84 % (After 100 cycles at 500 mA g <sup>-1</sup> ) | 1.2                           | 1         |
| NiCo <sub>2</sub> O <sub>4</sub> @NiCo <sub>2</sub> O <sub>4</sub> Nanocactus/NF | 925 mAh g <sup>-1</sup> (at 120 mA g <sup>-1</sup> )  | 407 mAh g <sup>-1</sup> (at 960 mA g <sup>-1</sup> )  | 90% (After 100 cycles at 120 mA g <sup>-1</sup> )  | 3.0                           | 2         |
| NiCo <sub>2</sub> O <sub>4</sub> complex hollow spheres                          | 1401 mAh g <sup>-1</sup> (at 150 mA g <sup>-1</sup> ) | 533 mAh g <sup>-1</sup> (at 2000 mA g <sup>-1</sup> ) | 78% (After 100 cycles at 200 mA g <sup>-1</sup> )  | -                             | 3         |

|                                                    |                                                           |                                                          |                                                      |   |   |
|----------------------------------------------------|-----------------------------------------------------------|----------------------------------------------------------|------------------------------------------------------|---|---|
| NiCo <sub>2</sub> O <sub>4</sub> /C nanocomposites | 1154 mAh g <sup>-1</sup><br>(at 40 mA g <sup>-1</sup> )   |                                                          | 78.3%<br>(After 50 cycles at 40 mA g <sup>-1</sup> ) | - | 4 |
| flower-like NiCo <sub>2</sub> O <sub>4</sub>       | ~1280 mAh g <sup>-1</sup><br>(at 150 mA g <sup>-1</sup> ) | 420 mAh g <sup>-1</sup><br>(at 2000 mA g <sup>-1</sup> ) | ~55%<br>(After 60 cycles at 500 mA g <sup>-1</sup> ) | - | 5 |
| NiCo <sub>2</sub> O <sub>4</sub> microspheres      | ~1680 mAh g <sup>-1</sup><br>(at 100 mA g <sup>-1</sup> ) | 393 mAh g <sup>-1</sup><br>(at 1600 mA g <sup>-1</sup> ) | ~53%<br>(After 70 cycles at 800 mA g <sup>-1</sup> ) | - | 6 |
| NiCo <sub>2</sub> O <sub>4</sub> -RGO composite    | 1351 mAh g <sup>-1</sup><br>(at 100 mA g <sup>-1</sup> )  | 396 mAh g <sup>-1</sup><br>(at 800 mA g <sup>-1</sup> )  | 80.1%<br>(After 70 cycles)                           | - | 7 |

## References

- 1 L. F. Shen, Q. Che, H. S. Li and X. G. Zhang, *Adv. Funct. Mater.* 2014, 24, 2630–2637.
- 2 J. B. Cheng, Y. Luo, Y. Lu, K. Q. H. L. Yan. et al. *Sci. Rep.* 5, 12099; doi: 10.1038/srep12099 (2015).
- 3 L. F. Shen, L. Yu, X. Y. Yu, X. G. Zhang, and X. W. (David) Lou. *Angew. Chem. Int. Ed.* 2015, 54, 1868–1872.
- 4 Y. N. NuLi, P. Zhang, Z. P. Guo, H. K. Liu, J. Yang, *Electrochem. Solid-State Lett.* 2008, 11, A64.
- 5 L. L. Li, Y. Cheah, Y. W. Ko, P. Teh, G. Wee, C. L. Wong, S. J. Peng, M. Srinivasan, *J. Mater. Chem. A* 2013, 1, 10935.
- 6 J. F. Li, S. L. Xiong, Y. R. Liu, Z. C. Ju, Y. T. Qian, *ACS Appl. Mater. Interfaces* 2013, 5, 981.
- 7 Y. J. Chen, M. Zhuo, J. W. Deng, Z. Xu, Q. H. Li, T. H. Wang, *J. Mater. Chem. A* 2014, 2, 4449.
